# Supplementary material
Source: Elsevier journal article supplement (https://comptes-rendus.academie-sciences.fr/chimie/article/10.1016/j.crci.2008.06.020/file/attach/mmc3.pdf)
Supplement: mmc3 [file mmc3.pdf]

### Supporting Information 3 (Oliveira et al.)

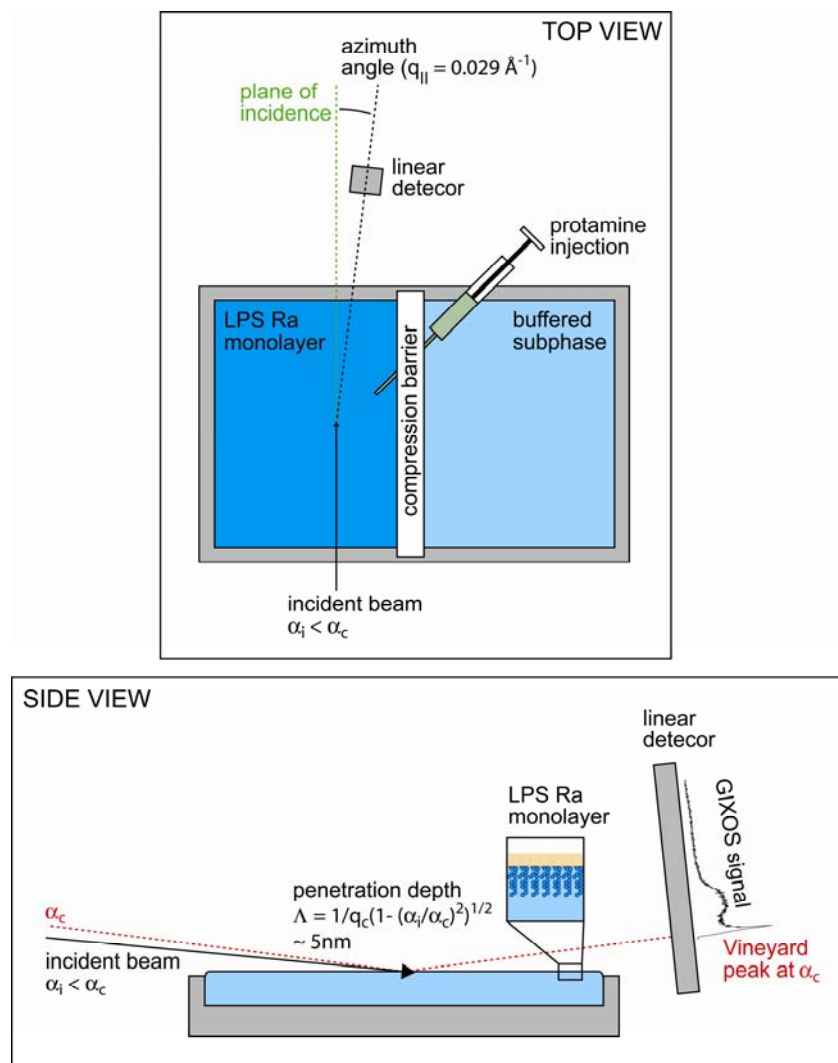

Schematic illustrations of the GIXOS setup: top view (upper panel) and side view (lower panel).
